# Supplementary material for: Profiling the Bioactive Compounds in Broccoli Heads with Varying Organ Sizes and Growing Seasons
Source: MDPI journal article supplement (doi:10.3390/plants13101329), 2024-05-11
Supplement: s1 [file s1]

**Supplemental Table S1** Temperature of two growing seasons in Xiangshui county (119°29' E, 33°56' N, Jiangsu, China)

| Growing season               | Month     | Average high temperature | Average low temperature | Extreme heat | Extreme low temperature |
|------------------------------|-----------|--------------------------|-------------------------|--------------|-------------------------|
| Winter-spring growing season | January   | 7°C                      | -3°C                    | 16°C         | -12°C                   |
|                              | February  | 11°C                     | 1°C                     | 17°C         | -4°C                    |
|                              | March     | 13°C                     | 4°C                     | 22°C         | -2°C                    |
|                              | April     | 19°C                     | 9°C                     | 24°C         | 3°C                     |
| Summer-autumn growing season | July      | 31°C                     | 23°C                    | 35°C         | 21°C                    |
|                              | August    | 29°C                     | 23°C                    | 32°C         | 20°C                    |
|                              | September | 27°C                     | 31°C                    | 31°C         | 16°C                    |
|                              | October   | 21°C                     | 13°C                    | 32°C         | 6°C                     |

*Note:* temperature data from the website (<https://www.tianqi24.com/xiangshui/history202107.html>).

**Supplemental Table S2** Linear regression data for ferulic acid, catechin, quercetin, caffeic acid, chlorogenic acid, rutin, and glucoraphanin in broccoli head samples.

| Compounds        | Regression equation | $R^2$  |
|------------------|---------------------|--------|
| Ferulic acid     | $Y=8.2453x-25.526$  | 0.9998 |
| Catechin         | $Y=1.7503x-8.2948$  | 0.9999 |
| Quercetin        | $Y=3.9828x-10.581$  | 0.9999 |
| Caffeic acid     | $Y=9.207x-5.8537$   | 0.9994 |
| Chlorogenic acid | $Y=4.952x-64.614$   | 0.9981 |
| Rutin            | $Y=2.1049x+16.626$  | 0.9977 |
| Glucoraphanin    | $Y=3.5773x-11.947$  | 0.9999 |

**Supplemental Table S3** Condition parameters of mass spectrum analysis

| Compound                   | Retention time<br>(min) | Parent ion<br>(m/z) | Daughter<br>ion (m/z) | Fragmentor<br>voltage (v) | Collision<br>energy (eV) |
|----------------------------|-------------------------|---------------------|-----------------------|---------------------------|--------------------------|
| Ergosterol                 | 13.827                  | 379.4               | 125.0                 | 125                       | 10                       |
|                            |                         |                     | 69.0                  | 125                       | 25                       |
| Brassicasterol             | 17.421                  | 381.4               | 147.0                 | 115                       | 25                       |
|                            |                         |                     | 69.0                  | 115                       | 35                       |
| Cholesterol                | 17.785                  | 369.3               | 161.3                 | 100                       | 32                       |
|                            |                         |                     | 147.2                 | 100                       | 33                       |
| Campasterol                | 21.978                  | 383.4               | 161.1                 | 130                       | 20                       |
|                            |                         |                     | 95.1                  | 130                       | 40                       |
| Lanosterin                 | 22.044                  | 409.4               | 149.0                 | 120                       | 25                       |
|                            |                         |                     | 109.0                 | 120                       | 30                       |
| Stigmasterol               | 22.817                  | 395.5               | 147.3                 | 100                       | 25                       |
|                            |                         |                     | 83.1                  | 100                       | 20                       |
| Beta-sitosterol            | 27.347                  | 397.5               | 161.0                 | 100                       | 25                       |
|                            |                         |                     | 135.1                 | 100                       | 25                       |
| Beta-sitosteryl<br>acetate | 32.678                  | 399.5               | 137.3                 | 110                       | 25                       |
|                            |                         |                     | 95.3                  | 110                       | 25                       |

**Supplemental Table S4** Comparison of mineral content of broccoli heads with different growing seasons and organ sizes.

|                                          | W15                 | S15                  | S11                   |
|------------------------------------------|---------------------|----------------------|-----------------------|
| <b>phosphorus</b><br>( $\mu\text{g/g}$ ) | 8761 $\pm$ 359.43   | 9529.40 $\pm$ 252.74 | 10207.80 $\pm$ 705.70 |
| <b>zinc</b><br>( $\mu\text{g/g}$ )       | 8.50 $\pm$ 2.17     | 8.20 $\pm$ 2.28      | 5.00 $\pm$ 0.71       |
| <b>potassium</b><br>( $\mu\text{g/g}$ )  | 2284.50 $\pm$ 52.92 | 2261.00 $\pm$ 87.39  | 2230.20 $\pm$ 162.93  |
| <b>sodium</b><br>( $\mu\text{g/g}$ )     | 76.50 $\pm$ 6.77    | 74.00 $\pm$ 10.51    | 68.00 $\pm$ 5.15      |
| <b>magnesium</b><br>( $\mu\text{g/g}$ )  | 155.67 $\pm$ 11.96  | 166.00 $\pm$ 6.40    | 167.20 $\pm$ 6.87     |
| <b>calcium</b><br>( $\mu\text{g/g}$ )    | 326.00 $\pm$ 75.48  | 256.80 $\pm$ 12.32   | 286.80 $\pm$ 10.33    |
| <b>iron</b><br>( $\mu\text{g/g}$ )       | 119.50 $\pm$ 19.55  | 326.80 $\pm$ 129.88  | 120.40 $\pm$ 5.03     |

Notes: the mean  $\pm$  SEM are shown. Number of replicates  $n = 6-8$ .

**Supplemental Table S5** The principal component analysis (PCA) of individual phenolic compound and calculation of comprehensive scores in the three groups.

| Samples | Comprehensive average scores |
|---------|------------------------------|
| S11     | 0.0433                       |
| S15     | 0.0067                       |
| W15     | -0.0500                      |

**Supplemental Table S6** The PCA of 6 phytosterol contents and calculation of comprehensive scores in the three groups (W15, S15, and S11).

| Samples | Comprehensive average scores |
|---------|------------------------------|
| S11     | 0.0475                       |
| S15     | 0.0410                       |
| W15     | -0.0780                      |

**Supplemental Table S7** The PCA of the mineral contents and calculation of comprehensive scores in the three groups (W15, S15, and S11).

| Samples | Comprehensive average scores |
|---------|------------------------------|
| S15     | 0.0220                       |
| W15     | 0.0083                       |
| S11     | 0.0340                       |
